# Supplementary material for: Arabidopsis ALA1 and ALA2 Mediate RNAi-Based Antiviral Immunity
Source: PubMed Central journal article supplement (PMC5383662; doi:10.3389/fpls.2017.00422), 2017-04-07
Supplement: Presentation_1.pdf [file Presentation_1.pdf]

## Supplementary Figures

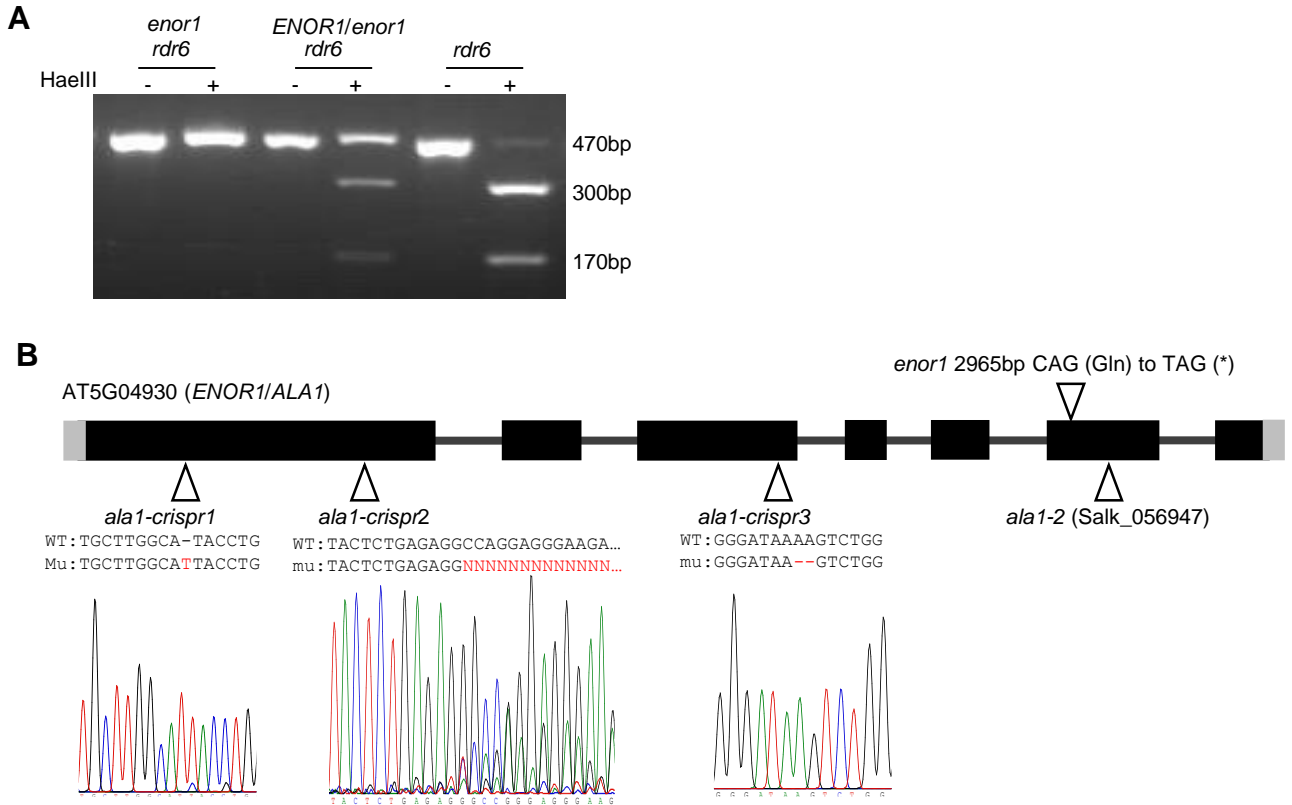

**Figure S1. Molecular identification of *ENOR1*.**

(A) The nucleotide mutation in *ENOR1* (*ALA1*) of *enor1 rdr6* led to a mutation (GGCC to GGCT) of the recognition sequence of HaeIII. The 470bp PCR product spanning the HaeIII site can be cleaved into fragments of 170bp and 300bp in *rdr6* but not in *enor1 rdr6*.

(B) Schematic diagram shows the structure of *ENOR1/ALA1* (AT5G04930) and the mutations of *ala1* mutants. The positions of mutation sites of *ALA1* in *enor1 rdr6*, *ala1-2* (Salk\_056947) and *ala1* mutants (*ala1-crispr1*, *ala1-crispr2*, and *ala1-crispr3*) generated by CRISPR/Cas9 are indicated by open triangles. The *ALA1* gene in *enor1 rdr6* contains a C-to-T mutation at 2965th bp of CDS, converting a Gln codon (CAG) to a premature stop codon (TAG). The *ALA1* gene in *ala1-crispr1* contains a 1-bp insertion, and that in *ala1-crispr3* has a 2-bp deletion. The *ALA* gene in *ala1-crispr2* contains chimeric mutations represented with “NNN...” from the 1120th bp of *ALA1* CDS.

YFP-ALA1 + mCherry-ER-marker

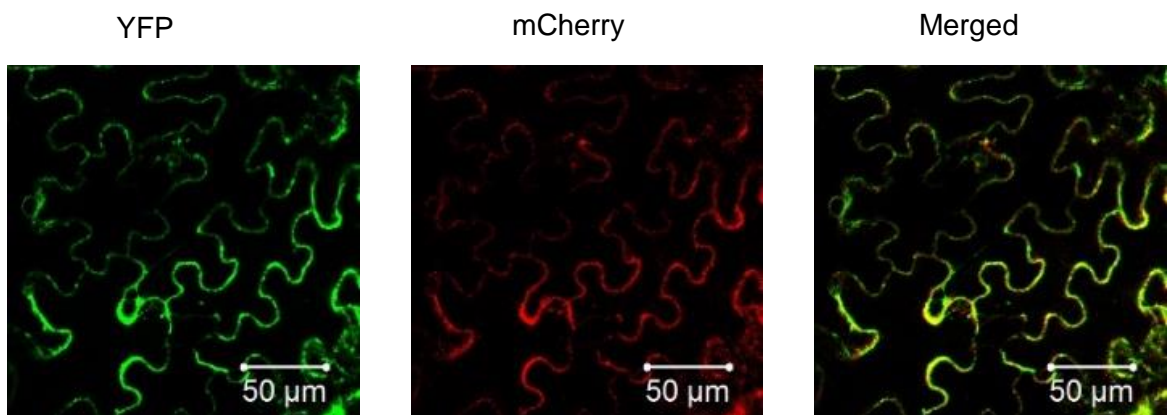

**Figure S2. Subcellular localization of ALA1.**

ALA1 with fusion of YFP (YFP-ALA1) was co-infiltrated with the mCherry-ER marker in leaves of *Nicotiana benthamiana*, and the fluorescence signals were detected 50h after co-infiltration.

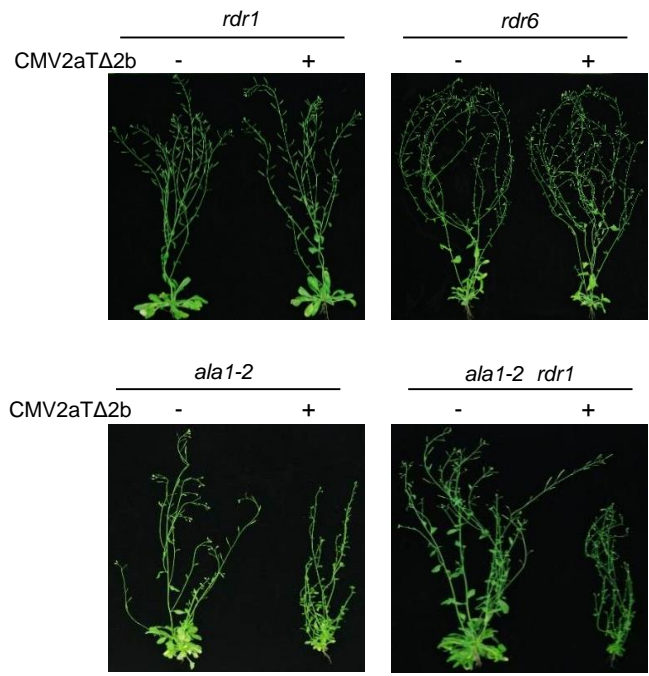

**Figure S3. Pathogenic responses of *rdr1*, *rdr6*, *ala1-2* and *ala1-2 rdr1*.**

The plants were photographed at 45 d after infection with mock or CMV2aTΔ2b.

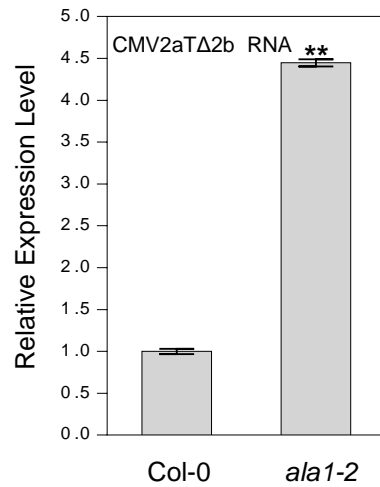

**Figure S4. Accumulation of CMV2aTΔ2b genomic RNA in inoculated Col-0 and *ala1-2*.** Quantitative real-time PCR analysis of the accumulation of CMV2aTΔ2b RNA in Col-0 and *ala1-2* at 21 d after inoculation. The data are means ( $\pm$ SE) from three biological repeats. The asterisks represent significant differences in mutants compared with Col-0 by Student's t-test, \*\* $P < 0.01$ .

**A**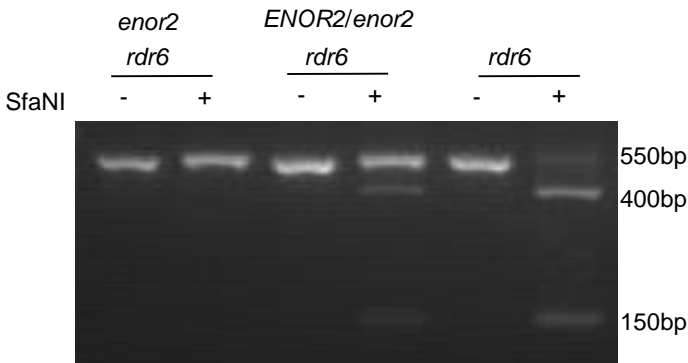**B**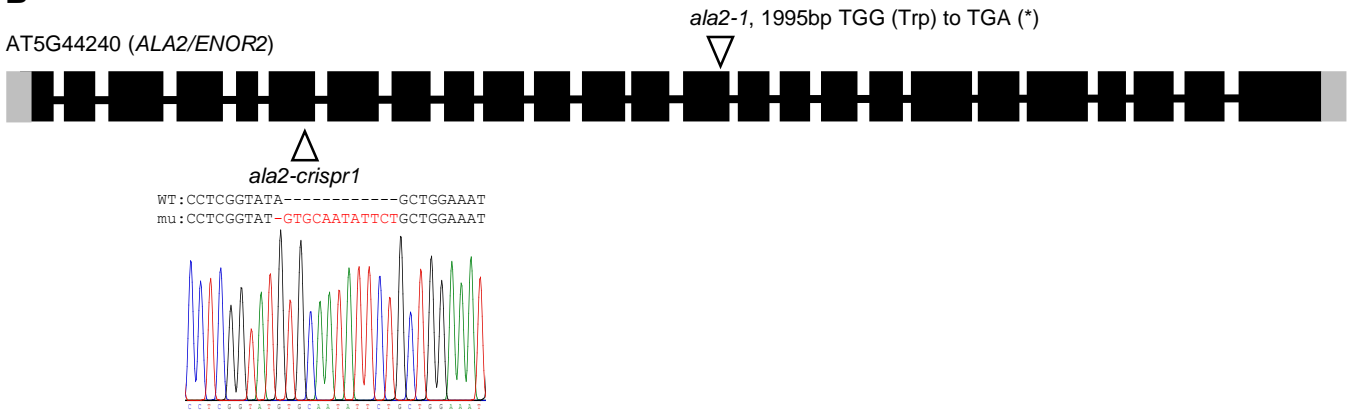**Figure S5. Molecular identification of *ENOR2*.**

(A) The nucleotide mutation in the *ENOR2* (*ALA2*) gene of *enor2 rdr6* led to a mutation (GATGC to AATGC) of the recognition sequence of SfaNI. The 550bp PCR product spanning the SfaNI site can be cleaved into fragments of 150bp and 400bp in *rdr6* but not in *enor2 rdr6*.

(B) Schematic diagram shows the structure of *ENOR2/ALA2* (AT5G44240) and the mutations of *ala2* mutants. The positions of mutation sites of *ALA2* are indicated by open triangles. The *ALA2* gene in *enor2 rdr6* contains a G-to-A mutation at 1995th bp of CDS, converting a Trp codon (TGG) to a premature stop codon (TGA). The *ALA2* gene in *ala2-crispr1* generated by CRISPR/Cas9 contains a 1-bp deletion and a 12-bp insertion.

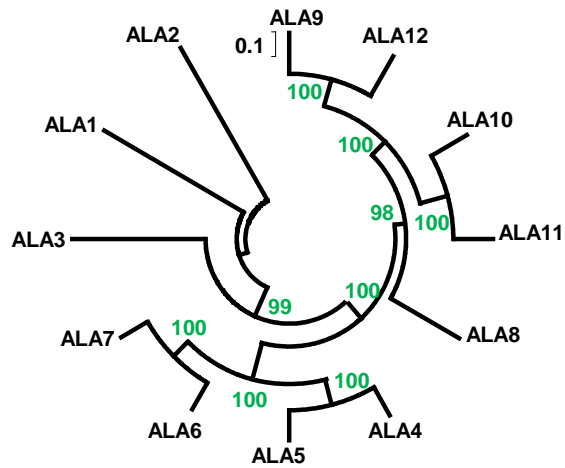

**Figure S6. Phylogenetic analysis of Arabidopsis P4-type ATPase.**

0.1 stands for distance scale. The numbers in green represent node statistics.

## Supplementary Tables

**Table S1. List of primers used in this work.**

|                        |         |                                              |
|------------------------|---------|----------------------------------------------|
| <i>rdr1-1</i> -TDNA    | Forward | TGTCACCAGAAGAAGCTCCAG                        |
| <i>rdr1-1</i> -TDNA    | Reverse | TTCCTTTCGTATAGTTGGGCC                        |
| <i>rdr6-15</i> -TDNA   | Forward | TCTCCGCATTGCTTCTATTTC                        |
| <i>rdr6-15</i> -TDNA   | Reverse | GCTGCAAATAAGCACAAAGC                         |
| Salk_056947            | Forward | GCCATTGGTGATGGTAATGAC                        |
| Salk_056947            | Reverse | CCCTGTTTAAGAAAAGCGATG                        |
| GK317H04-TDNA          | Forward | TTTCTGATCGTGTCATTATTCAACTG                   |
| GK317H04-TDNA          | Reverse | TGTTGTAGAAATCGAATTACCCTG                     |
| Salk_125598-<br>TDNA   | Forward | GGGGCGTCGTAGAATAAGATC                        |
| Salk_125598-<br>TDNA   | Reverse | GCTGATGAAGGAGACAAGCAC                        |
| Salk_024877-<br>TDNA   | Forward | GTACGGAGCTGTCGTTTTAC                         |
| Salk_024877-<br>TDNA   | Reverse | AGAACTCGAACCCGA ACTCTC                       |
| <i>alal-cripsr1-sg</i> | Forward | GGTTTCCTGCTTGGCATACCGTTTTAG<br>AGCTAGAAATAGC |
| <i>alal-cripsr1-sg</i> | Reverse | GGTATGCCAAGCAGGAAACCAATCAC<br>TACTTCGACTCTAG |

|                             |                     |                                              |
|-----------------------------|---------------------|----------------------------------------------|
| <i>ala1-crispr1-sg-cas9</i> | Forward-<br>HindIII | CCCTTAAGCTTCGTTGAACAACGGAA<br>AC             |
| <i>ala1-crispr1-sg-cas9</i> | Reverse-SalI        | TATCAAGCTTATCGATACCGTCGAC                    |
| <i>ala1-crispr1-seq</i>     | Forward             | ACGGTTTGAGTTCACTGGGA                         |
| <i>ala1-crispr1-seq</i>     | Reverse             | TGGCCTCTCAGAGTAGTCCT                         |
| <i>ala1-crispr2-sg</i>      | Forward             | GAGGACTACTCTGAGAGGCCGTTTAA<br>GAGCTAGAAATAGC |
| <i>ala1-crispr2-sg</i>      | Reverse             | GGCCTCTCAGAGTAGTCCTCAATCACT<br>ACTTCGACTCTAG |
| <i>ala1-crispr2-sg-cas9</i> | Forward-<br>HindIII | CCCTTAAGCTTCGTTGAACAACGGAA<br>AC             |
| <i>ala1-crispr2-sg-cas9</i> | Reverse-SalI        | TATCAAGCTTATCGATACCGTCGAC                    |
| <i>ala1-crispr2-seq</i>     | Forward             | GGGCTTTAGGGGTTGTTGTG                         |
| <i>ala1-crispr2-seq</i>     | Reverse             | CTTCTGTTGCCTTGCCAGTT                         |
| <i>ala1-crispr3-sg</i>      | Forward             | GGATTGCAGGGATAAAAGTCGTTTAA<br>GAGCTAGAAATAGC |
| <i>ala1-crispr3-sg</i>      | Reverse             | GACTTTTATCCCTGCAATCCAATCACT<br>ACTTCGACTCTAG |
| <i>ala1-crispr3-sg-cas9</i> | Forward-<br>HindIII | CCCTTAAGCTTCGTTGAACAACGGAA<br>AC             |



|                              |                 |                                              |
|------------------------------|-----------------|----------------------------------------------|
| <i>ala1-crispr3-sg-cas9</i>  | Reverse-SalI    | TATCAAGCTTATCGATACCGTCGAC                    |
| <i>ala1-crispr3-seq</i>      | Forward         | TACGGTGGCGTCATACATGA                         |
| <i>ala1-crispr3-seq</i>      | Reverse         | ATCCCTACCCCAACATCAGC                         |
| <i>ala2-crispr-1-sg</i>      | Forward         | GTTCTGGTCCTCGGTATAGCGTTTTAG<br>AGCTAGAAATAGC |
| <i>ala2-crispr-1-sg</i>      | Reverse         | GCTATACCGAGGACCAGAACAATCAC<br>TACTTCGACTCTAG |
| <i>ala2-crispr-1-sg-cas9</i> | Forward-HindIII | CCCTTAAGCTTCGTTGAACAACGGAA<br>AC             |
| <i>ala2-crispr-1-sg-cas9</i> | Reverse-SalI    | TATCAAGCTTATCGATACCGTCGAC                    |
| <i>ala2-crispr1-seq</i>      | Forward         | GCAAACATGCGCTTATTTCCG                        |
| <i>ala2-crispr1-seq</i>      | Reverse         | GTCTGCCTCTGTCCTGAACT                         |
| <i>enor1-caps</i>            | Forward         | GGACACTGGAATTACCAAAGGATG                     |
| <i>enor1-caps</i>            | Reverse         | GTGAAGATTAACCACCACAACACTGC                   |
| <i>enor2-dcaps</i>           | Forward         | ATTTAAATGTCCAGGACTAGTGAG                     |
| <i>enor2-dcaps</i>           | Reverse         | TCAGAGCAATTTCTAGAGC                          |
| <i>ALA1-35SOE-3FLAG</i>      | Forward-SmaI    | GGGGGGCCCGGGATGGATCCCAGGAA<br>ATCAATTG       |
| <i>ALA1-35SOE-3FLAG</i>      | Reverse-XbaI    | GGGGGGTCTAGATCATCTCCGTGGAG<br>GATCCTGAATC    |

|                        |         |                                                |
|------------------------|---------|------------------------------------------------|
| <i>ALA1-PJG054-YFP</i> | Forward | CGACGACAAGACCGTGGATCCCAGGA<br>AATCAATTGA       |
| <i>ALA1-PJG054-YFP</i> | Reverse | GAGGAGAAGAGCCGTCATCATCTCCG<br>TGGAGGATCCTGAATC |
| ALA1-qRT               | Forward | ATGTTATACCCACACTCCCTGGT                        |
| ALA1-qRT               | Reverse | ACATCCATGTCTTGCCCACT                           |
| ALA2-qRT               | Forward | ACTTGTGGGAGCAATTCAGC                           |
| ALA2-qRT               | Reverse | CACAGGGGTGATAAGTGACCA                          |
| ALA3-qRT               | Forward | AGGCACTTGAAAGGACATGG                           |
| ALA3-qRT               | Reverse | TGTTTGGTTGCTCACACTGAA                          |
| ALA4-qRT               | Forward | GCCCTTGGAGTCTTTGAACA                           |
| ALA4-qRT               | Reverse | TGTTGGTACAACGCTGGAAA                           |
| ALA5-qRT               | Forward | ATGTTTCTTCCGAGATCTGCTT                         |
| ALA5-qRT               | Reverse | GGTTCTTTGTGCCTTGTTGG                           |
| ALA6-qRT               | Forward | GTAAAGGCGCTGACAGCAT                            |
| ALA6-qRT               | Reverse | CCCGCTTCACCATATACATTC                          |
| ALA7-qRT               | Forward | AGAAAGGGGTGCCTCAATG                            |
| ALA7-qRT               | Reverse | ACCCTGTCTCAGCAAACCTGC                          |
| ALA8-qRT               | Forward | AACCGGTTGTTGTTGCTTTC                           |
| ALA8-qRT               | Reverse | TCCATGTTTCGCAAGTCTTTT                          |
| ALA9-qRT               | Forward | GTGCGTCTGTCATTTGTTGC                           |
| ALA9-qRT               | Reverse | TCCAGATTTTACTAGTCTTGTCACCA                     |

|             |         |                        |
|-------------|---------|------------------------|
| ALA10-qRT   | Forward | GGGAAGCTCTTGCTGTTGTC   |
| ALA10-qRT   | Reverse | ACGACCGTTCTTTGCAAGTC   |
| ALA11-qRT   | Forward | CGACGAAGATGGGAGACTTC   |
| ALA11-qRT   | Reverse | CCGTTTTTGGCTAGTCTTTCA  |
| ALA12-qRT   | Forward | AAAGATTTGGGTTTTGACTGGA |
| ALA12-qRT   | Reverse | TTCATGTCTCGTCTGAGCAAA  |
| ACTIN8-qRT  | Forward | TCAGCACTTTCCAGCAGATG   |
| ACTIN8-qRT  | Reverse | CTGTGGACAATGCCTGGAC    |
| CMV-RNA-qRT | Forward | GTGAACGGGTTGTCCATCCAGC |
| CMV-RNA-qRT | Reverse | TGAAACTAGCACGTTGTGCTAG |
